# Supplementary material
Source: publisher site journal article supplement (https://www.dovepress.com/article/534366)
Supplement: Supplementary file 1 [file 534366%20Supplementary%20Material.docx]

**Supplementary Table 1. Baseline Characteristics of Included versus Excluded Patients**

| **Variable** | **Included Patients (n=439)** | **Excluded Patients (n=161)** | **Reason for Exclusion (Dominant for Excluded Group)** |
| --- | --- | --- | --- |
| Age (years, mean ± SD) | 55.0 ± 22.0 | 58.5 ± 20.1 | Treatment duration < 2 days (n=50); Severe comorbidities (advanced liver disease, hematological malignancies, sepsis, severe trauma, DIC) (n=45); Concurrent use of heparin/oral anticoagulants (n=35); Incomplete clinical data (n=20); Allergy to related medications (n=11) |
| Male Gender, n (%) | 261 (59.45%) | 90 (55.9%) |
| Malnutrition, n (%) | 94 (21.41%) | 40 (24.8%) |
| Chronic Kidney Disease, n (%) | 33 (7.52%) | 30 (18.6%) |
| Recent Bleeding History, n (%) | 126 (28.70%) | 55 (34.2%) |
| Serum Creatinine (μmol/L, mean ± SD) | 73.9 ± 16.2 | 95.1 ± 25.5 |
| Albumin (g/L, mean ± SD) | 38.3 ± 5.6 | 36.5 ± 6.0 |
